1 **Multimodal activation of GPR68 (OGR1) probed with a genetically-encoded fluorescent**  
2 **reporter**

3  
4 Alper D Ozkan<sup>1†</sup>, Tina Gettas<sup>1†</sup>, Audrey Sogata<sup>2</sup>, Wynn Phaychanpheng<sup>2</sup> and Jérôme Lacroix<sup>1\*</sup>

5  
6 <sup>1</sup>Graduate College of Biomedical Sciences, Western University of Health Sciences, 309 E. Second  
7 St, Pomona, CA 91766

8  
9 <sup>2</sup>Ayala High School, 14255 Peyton Drive, Chino Hills, CA 91709

10  
11 <sup>†</sup>equally-contributing authors

12  
13 **\*corresponding author**

14 Dr. Jerome J. Lacroix

15 Western University of Health Sciences

16 309 E. Second St, Pomona, CA 91766

17 Tel: 909-469-8201

18 Email: [jlacroix@westernu.edu](mailto:jlacroix@westernu.edu)

19

20

21

22

23 **Abstract**

24 G-protein coupled receptor (GPCR) 68 (GPR68, or OGR1) couples extracellular acidifications and  
25 mechanical cues to G protein signaling and plays important roles in vascular physiology,  
26 neuroplasticity and cancer progression. The mechanism of mechanosensitivity in GPR68 is  
27 currently unknown. Here, to study this mechanism, we designed a genetically-encoded fluorescent  
28 reporter of GPR68 by fusing a cyclic permuted green fluorescent protein to the third intracellular  
29 loop of the receptor. Stimulation with fluid shear stress, extracellular acidifications or the synthetic  
30 activator ogerin transiently and robustly increases iGlow's baseline fluorescence up to 4-fold.  
31 Flow-induced iGlow activation was not suppressed by pharmacological uncoupling of downstream  
32 G-protein recruitment, disruption of actin filaments, inhibition of membrane stretch with the  
33 peptide toxin GsMTx4, or deletion of a C-terminal amphipathic Helix (Helix 8) proposed to  
34 mediate GPCR mechanosensitivity. These results hint that GPR68 uses a hitherto unknown, non-  
35 canonical mechanism to sense mechanical forces.

36

37

38

39

## 40 **Introduction**

41 G-protein coupled receptors (GPCRs) constitute the largest known family of membrane receptors,  
42 comprising at least 831 human homologs organized into 6 functional classes (A to F). They play  
43 essential roles in a wide range of biological functions spanning all major physiological systems  
44 such as olfaction, energy homeostasis and blood pressure regulation. They also control embryonic  
45 development and tissue remodeling in adults. The biological significance of GPCRs is underscored  
46 by the fact that ~13% of all known human GPCRs represent the primary targets of ~34% of all  
47 pharmaceutical interventions approved by the Food and Drug Administration<sup>1</sup>.

48 GPCRs possess a conserved structure encompassing seven transmembrane helices and  
49 switch between resting and active conformations depending on the presence of specific physico-  
50 chemical stimuli. Besides the vast repertoire of small molecules recognized by GPCRs such as  
51 odorants, hormones, cytokines and neurotransmitters, other physico-chemical cues can act as  
52 GPCR activators such as photons<sup>2</sup>, ions<sup>3</sup>, membrane depolarizations<sup>4-8</sup> and mechanical forces<sup>9-12</sup>.  
53 An inherent challenge for the study of GPCR signaling is the fact that GPCRs may often respond  
54 to more than one stimulus, therefore acting as complex stimuli integrators.

55 Activated GPCRs physically interact with heterotrimeric G-proteins ( $G\alpha$ ,  $G\beta$  and  $G\gamma$ ) and  
56 promote the exchange of guanosine diphosphate (GDP) for guanosine triphosphate (GTP) on the  
57  $G\alpha$  subunit upon binding. This process, called G-protein engagement, enables GTP-bound  $G\alpha$   
58 subunits to dissociate from the GPCR: $G\beta\gamma$  complex and activate downstream cellular effectors.  
59 Eighteen  $G\alpha$  subunit homologs have been so far identified in mammalian genomes.  $G\alpha$  subunits  
60 are clustered into four groups,  $G\alpha_s$ ,  $G\alpha_i$ ,  $G\alpha_q$  and  $G\alpha_{12}$ , each group targeting distinct downstream  
61 signaling effectors<sup>13</sup>. Many GPCRs can engage more than one type of  $G\alpha$  subunits. In addition,  
62  $G\alpha$  proteins are highly regulated by various regulatory proteins such as Resistance to inhibitors of

63 cholinesterase 8 (Ric-8A/B) proteins<sup>14</sup> and Regulator of G-protein Signaling (RGS)<sup>15</sup>. Hence, the  
64 initiation of GPCR-mediated cellular signals depends not only on the presence of specific stimuli  
65 but also on the presence and cellular availability of specific types of G $\alpha$  proteins.

66 One example of GPCR exhibiting complex stimuli integration and pleiotropic G-protein  
67 signaling is GPR68. GPR68 is a class-A GPCR originally cloned from an ovarian cancer cell line  
68 and hence named Ovarian cancer G-protein coupled Receptor 1, or OGR1<sup>16</sup>. Early studies showed  
69 that the lipid sphingophosphorylcholine acts as an endogenous GPR68 ligand<sup>17,18</sup>, although one  
70 of these two studies has been subsequently retracted<sup>19</sup>. It is now well established that GPR68 is  
71 physiologically activated by extracellular protons<sup>20</sup>, a property shared with only three other GPCRs  
72 to date (GPR4, GPR65 and GPR132). In addition, recent evidence show that mechanical forces  
73 such as fluid shear stress and membrane tension act as an effective GPR68 positive modulator in  
74 the presence of protons<sup>9,10</sup>, enabling GPR68 to mediate flow-induced dilation of small-diameter  
75 arteries<sup>9</sup>. GPR68 can engage G $\alpha_{q/11}$ , which increases cytosolic concentration of calcium ions  
76 ( $[Ca^{2+}]_{cyt}$ ) *via* phospholipase C- $\beta$  (PLC- $\beta$ ) as well as G $\alpha_s$ , which increases the production of cyclic  
77 adenosine monophosphate (cAMP) *via* adenylate cyclase activation. Interestingly, incubation with  
78 the synthetic positive modulator ogerin increases pH-dependent cAMP production by GPR68 but  
79 reduces pH-dependent calcium signals, suggesting ogerin acts as a biased positive allosteric  
80 modulator of GPR68<sup>21</sup>. GPR68 is expressed in various tissues and is often up-regulated in many  
81 types of cancers<sup>9,22</sup>. Interestingly, ogerin suppresses recall in fear conditioning in wild-type but not  
82 GPR68<sup>-/-</sup> mice, suggesting a role of GPR68 in learning and memory<sup>21</sup>. Hence, although its  
83 contribution to vascular physiology has been established, its roles in other organs and in cancer  
84 progression remain unclear.

85 GPCR activation is often monitored using Fluorescence Resonance Energy Transfer  
86 (FRET) or Bioluminescence Resonance Energy Transfer (BRET)<sup>11,23,24</sup>. However, FRET  
87 necessitates complex measurements to separate donor and acceptor emissions whereas BRET often  
88 requires long integration times and sensitive detectors to capture faint signals. In contrast, recent  
89 ligand-binding reporters engineered by fusing GPCR with a cyclic permuted Green Fluorescent  
90 Protein (cpGFP) have enabled robust and rapid *in vitro* and *in vivo* detection of GPCR activation  
91 by dopamine<sup>25,26</sup>, acetylcholine<sup>27</sup> and norepinephrine<sup>28</sup> using simple intensity-based fluorescence  
92 measurements. Here, to facilitate future investigations of GPR68, we borrowed a similar cpGFP-  
93 based engineering approach to create a genetically-encodable reporter of GPR68-mediated  
94 signaling. We call it indicator of GPR68 signaling by mechanical forces and low pH, or iGlow.

95

96

97

98

99

100

## 101 **Results**

### 102 **iGlow design and characterization**

103 We sought to design iGlow by borrowing a protein engineering design from dLight1.2, a  
104 genetically-encoded dopamine sensor<sup>25</sup>. In dLight1.2, a fluorescence signal is produced by  
105 fluorescence dequenching of a cyclic permuted green fluorescent protein (cpGFP) inserted into the  
106 third intracellular loop of the DRD1 dopamine receptor. We generated iGlow by inserting cpGFP  
107 into the homologous position in the third intracellular loop of human GPR68, flanking cpGFP with  
108 the same N-terminal (LSSLI) linker and C-terminal (NHDQL) linkers as in dLight1.2 (**Figure 1A**,  
109 **Supplementary Figure 1 and Supplementary Table 1**). HEK293T cells transiently expressing  
110 iGlow were seeded into microscope-compatible flow chambers, allowing us to apply desired  
111 amount of fluid shear stress (FSS) by circulating Hank's Balanced Salt Solution (HBSS, pH 7.3)  
112 using a computer-controlled peristaltic pump while green fluorescence emission from iGlow is  
113 continuously monitored.

114 In order to determine accurately the amplitude of shear stress applied inside our  
115 commercial flow chamber, we compared shear stress values determined by multiplying the average  
116 flow-rate by a coefficient provided by the manufacturer to values calculated by particle  
117 velocimetry measurement (**see Methods and Supplementary Figure 2**). We observed that  
118 increasing flow rate tends to increase fluctuations of velocity measurements, yielding a poor linear  
119 fit between flow rate and shear stress ( $R^2 = 0.19$ ). We attribute these fluctuations to the peristaltic  
120 nature of the flow, which inevitably produces fluctuations in instantaneous flow rate. Nevertheless,  
121 the fitted slope value obtained from velocity measurements was near the manufacturer's calibration  
122 ( $1.75 \pm 0.65$  dyne mL cm<sup>-2</sup> min<sup>-1</sup> vs. 1.316 dyne mL cm<sup>-2</sup> min<sup>-1</sup>). Hence, we used the manufacturer's  
123 calibration to determine the amplitude of shear stress in all our experiments.

124           When stimulated with incremental FSS pulses (10 sec on, 10 sec off), iGlow produced  
125 robust increases in green fluorescence intensity, with an average maximal response (max  $\Delta F/F_0$ )  
126 of  $+32 \pm 3 \%$  ( $n = 43$ ) (**Figure 1B-D**). In most cells, the activation threshold of iGlow was below  
127  $1 \text{ dyne cm}^{-2}$ , although some cells showed higher mechanical threshold near  $4 \text{ dyne cm}^{-2}$  (**Figures**  
128 **1E**). Co-transfection of iGlow with a mCherry-encoding plasmid did not yield comparable  
129 fluorescence changes in the red fluorescence channel, indicating cpGFP fluorescence changes do  
130 not result from imaging artifacts (**Figure 1C**). To rule out direct modulation of cpGFP fluorescence  
131 by FSS, we monitored green fluorescence from two other membrane proteins containing cpGFP  
132 and that are not anticipated to exhibit mechanosensitivity: the voltage indicator ASAP1<sup>29</sup> and Lck-  
133 cpGFP, a cpGFP we directly fused to the membrane-bound N-terminal domain of the Lymphocyte-  
134 specific kinase (Lck)<sup>30</sup>. In these cpGFP-containing proteins, no fluorescence changes other than  
135 photobleaching-induced decays occurred, even upon high flow conditions  $> 10 \text{ dyne cm}^{-2}$ ,  
136 confirming FSS-induced signals in iGlow require the presence of GPR68 (**Supplementary Figure**  
137 **3**).

138           We next compared fluorescence signals of iGlow and dLight1.2 when excited using a  
139 saturating physiological stimulation. We used a FSS pulse of  $2.6 \text{ dyne cm}^{-2}$  for iGlow and a  
140 perfusion with a  $10 \mu\text{M}$  dopamine solution for dLight1.2 ( $K_d$  for dopamine in dLight1.2 =  $765$   
141  $\text{nM}^{25}$ ). In these conditions, iGlow produced signals with significantly larger maximal amplitude  
142 compared to dLight1.2 ( $+40 \pm 7\%$  vs.  $+21 \pm 2\%$ , Student's T-test p-value = 0.0045) (**Figure 1F-**  
143 **H**).

144

145 **iGlow detects several modes of GPR68 activation**

146 We next sought to determine whether iGlow responds to all known GPR68 stimuli. Activation of  
147 iGlow using 10  $\mu\text{M}$  of the small molecule GPR68 agonist ogerin produced strong fluorescence  
148 transients, with a mean maximal amplitude of  $+55 \pm 19\%$ . In comparison, perfusion with a vehicle  
149 solution yielded negligible fluorescence changes, with a mean max  $\Delta F/F_0$  value of  $+6 \pm 1\%$  (Mann-  
150 Whitney U test, p-value = 0.012), likely due to unavoidable turbulent flow created during solution  
151 exchange (**Figure 2A-B**).

152 Since GPR68 activates in response to extracellular acidifications in a pH range 6.5-7.5, we  
153 next stimulated transfected cells to a 2.6 dyne  $\text{cm}^{-2}$  FSS pulse using solutions of different pH,  
154 starting from pH 8.2 to avoid pre-stimulation and/or desensitization of the receptor that may occur  
155 at a permissive physiological (neutral) pH<sup>9</sup>. As expected, the amplitude of iGlow's response  
156 increased as pH decreases, with mean max  $\Delta F/F_0$  values ranging from  $+21 \pm 2\%$  at pH 8.2,  $+29 \pm$   
157  $3\%$  at pH 7.3 and  $+44 \pm 7\%$  at pH 6.5 (**Figure 2C-D**). Student's T-test pairwise statistical analyses  
158 indicate these differences in mean fluorescence changes are statistically significant, with p-values  
159 ranging from 0.044 (pH 7.3 vs. pH 6.5) to 0.0297 (pH 7.3 vs. pH 8.2). Statistically significant  
160 differences among all groups is also supported by one-way ANOVA (p-value = 0.0021).

161

### 162 **iGlow senses GPR68 activation**

163 How does the cpGFP insert increases its fluorescence emission upon iGlow stimulation? Two  
164 distinct scenarios are plausible. First, as seems to be the case for dLight1.2 and GRAB<sub>DA</sub>, the  
165 fluorescent protein may sense stimulus-induced conformational rearrangements of the  
166 receptor<sup>25,26</sup>. Second, since cpGFP is located near the intracellular binding site for GDP-bound G  
167 proteins and regulatory kinases, we cannot exclude the possibility that iGlow could sense the  
168 interaction between the activated receptor and downstream signaling proteins. To distinguish



169 between these two possibilities, we stimulated iGlow with a 2.6 dyne cm<sup>-2</sup> FSS pulse in cells  
170 treated with one of several pharmacological agents preventing association or dissociation of G  
171 proteins (**Figure 3A**). We used GTP- $\gamma$ -S, a non-hydrolyzable GTP analog which prevents G $\alpha$   
172 protein association to all GPCRs; NF449, a GDP $\rightarrow$ GTP exchange inhibitor which selectively  
173 prevents G $\alpha_s$  dissociation from their receptor<sup>31</sup>; and BIM-46187, a non-specific GDP $\rightarrow$ GTP  
174 exchange G $\alpha$  inhibitor<sup>32</sup>. We also tested CMPD101, an inhibitor of G protein Receptor kinases 2/3  
175 (GRK2/3). Interestingly, the GTP- $\gamma$ -S treatment nearly doubles the average maximal amplitude of  
176 iGlow signals (max  $\Delta F/F_0 = +38 \pm 8\%$  vs.  $+78 \pm 21\%$ , Student's T-test p-value = 0.02), suggesting  
177 G protein binding partially quenches cpGFP fluorescence (**Figure 3B-C**). On the other hand, none  
178 of other pharmacological treatments induced significant change in signal amplitude (Student's T-  
179 tests p-values between 0.19 and 0.59). We also observed that dopamine-induced dLight1.2 signals  
180 were not affected by any of these pharmacological treatments (one-way ANOVA p-value =  
181 0.4214), as expected if dLight1.2 responds to receptor activation independently of downstream G  
182 protein signaling (**Supplementary Figure 4**). These results thus show iGlow specifically senses  
183 conformational rearrangements of GPR68.

184

### 185 **iGlow's mechanical activation is resilient**

186 The ionic currents produced from mechanosensitive ion channels is often reduced or abolished by  
187 disruption of actin filaments, as cytoskeletal elements often help transmitting mechanical forces  
188 across remote cellular microdomains. We transfected HEK293T cells with LifeAct-mScarlet to  
189 monitor real-time actin disorganization upon treatment with 20  $\mu$ M cytochalasin D (CD), an  
190 inhibitor of actin polymerization. Actin filaments were completely disorganized after about 20 min  
191 (**Figure 4A**). Since cell death could be detected after a one-hour CD treatment, we monitored

192 iGlow's response to FSS immediately after 20 min CD treatment. Cells produced fluorescence  
193 signals similar to untreated cells. We repeated the experiments after treating cells with 50  $\mu$ M CD  
194 and found no difference in maximum amplitude of iGlow signals among all groups (one-way  
195 ANOVA p-value = 0.4980) (**Figure 4B-C**). These results suggest GPR68 senses flow in an actin-  
196 independent manner.

197 Acute incubations with micromolar concentrations of the spider toxin GsMTx4 has been  
198 shown to robustly inhibit a broad range of mechanosensitive ion channels upon various mechanical  
199 stimulations, including membrane stretch, fluid shear stress and mechanical indentations<sup>33-37</sup>. We  
200 first performed a control experiments by measuring  $Ca^{2+}$  entry mediated by the mechanosensitive  
201 PIEZO1 channel in response to a single FSS pulse in the presence or absence of 2.5  $\mu$ M GsMTx4.  
202 We monitored intracellular free  $Ca^{2+}$  ions by co-transfecting PIEZO1-deficient cells with a mouse  
203 PIEZO1 plasmid and a plasmid encoding the fluorescent calcium indicator GCaMP6f. Our data  
204 show that this toxin concentration was able to reduce GCaMP6f's fluorescence response (max  
205  $\Delta F/F_0$ ) from  $+75 \pm 5$  % to  $+16 \pm 2$  %, a nearly 5-fold reduction (Student's T-test p-value =  $9.7 \times 10^{-18}$ )  
206 (**Figure 4D-E**). In contrast, the same treatment did not affect the amplitude of iGlow signals  
207 (Student's T-test p-value = 0.2057) (**Figure 4F-G**).

208 Class-A GPCRs harbor a structurally-conserved amphipathic helical motif located  
209 immediately after the seventh transmembrane segment, called Helix 8. A recent study showed that  
210 deletion of Helix 8 abolished mechanical, but not ligand-mediated, activation in the histamine  
211 receptor H1R<sup>24</sup>. Furthermore, transplantation of H1R Helix 8 into a mechano-insensitive GPCR  
212 was sufficient to confer mechanosensitivity to the chimeric receptor<sup>24</sup>. Hence, Helix 8 seems both  
213 necessary and sufficient to confer mechanosensitivity in, at least, some GPCRs<sup>24</sup>. The online tool  
214 NetWheels indicates that GPR68 also contains an amphipathic helical motif reminiscent to Helix

215 8 of H1R (**Supplementary Figure 5**). We introduced a non-sense codon (TGA) to delete this motif  
216 and the remainder of the C-terminal region from iGlow and tested the sensitivity of the deletion  
217 mutant (H8del) to our standardized FSS protocol. H8del produced robust fluorescence signals with  
218 a mean maximal amplitude of  $+ 29 \pm 3 \%$ , which was not statistically different than those produced  
219 by the full-length iGlow ( $+32 \pm 3 \%$ , Mann-Whitney U-test p-value = 0.9124) (**Figure 4H-J**). This  
220 result suggests that Helix 8, although present in GPR68, is dispensable for shear flow sensing by  
221 GPR68.

222

223

224

## 225 Discussion

226 In this study, we introduce iGlow, the first cpGFP-based fluorescence reporter for a polymodal  
227 GPCR. To work as a useful investigational tool, cpGFP-based reporters need to exhibit a large  
228 fluorescence intensity change between the bright and the dark states. Achieving such a large  
229 dynamic range often requires iterative rounds of mutagenesis and positive selection, for example  
230 through directed evolution. However, the first version of iGlow produced robust signals without  
231 needing additional optimization steps. Many studies have shown that a critical molecular  
232 determinant for modulating the dynamic range of cpGFP-based intensimetric reporters are the  
233 linkers connecting the N- and C- termini of cpGFP to the host protein(s) or protein domain(s). The  
234 linker sequences in iGlow are identical to the linker sequence of dLight1.2, a dopamine sensor  
235 where the linkers have been optimized through high-throughput mutational screening<sup>25</sup>. Hence,  
236 perhaps these specific linker sequences could confer a high fluorescence dynamic range to a broad  
237 range of host proteins. If true, these sequences could be used as a starting point to jump-start the  
238 design of new cpGFP-based indicators, in particular those using the sensory machinery of GPCRs.

239 To date, mechanosensitive GPCRs have been reported in at least one class-B GPCR  
240 (parathyroid hormone type 1 receptor)<sup>38</sup> and many class-A subfamilies including A3 (bradykinin  
241 receptor B2, Apelin receptor and angiotensin II type 1 receptor)<sup>11,39,40</sup>, A6 (vasopressin receptor  
242 1A)<sup>40</sup>, A13 (sphingosine receptor 1)<sup>41</sup>, A15 (GPR68)<sup>9,10</sup>, A17 (dopamine receptor DRD5)<sup>42</sup> and  
243 A18 (muscarinic receptor M5R and histamine receptor H1R)<sup>24,40</sup>. While a physiological role in  
244 flow-induced vasodilation has been clearly demonstrated for GPR68 and H1R, the physiological  
245 importance of GPCR-mediated mechanotransduction signaling in non-vascular tissues remains  
246 unclear<sup>9,24</sup>. Helix 8 has been shown both necessary<sup>9</sup> and sufficient to confer mechanosensitivity in  
247 certain class-A GPCRs such as H1R<sup>24</sup>. However, while H1R's mechanosensitivity is fully

248 uncoupled from histamine-induced activation<sup>24</sup>, GPR68's mechanosensitivity is coupled to the  
249 concentration of extracellular protons. Indeed, mechanical stimuli are not sufficient to activate  
250 GPR68 at high extracellular pH<sup>9</sup>. This suggests mechanical stimuli acts as positive modulators  
251 rather than independent activators of GPR68<sup>10,22</sup>. These observations hint that mechanosensation  
252 by class-A GPCRs is not mediated by a unique molecular mechanism. The existence of distinct  
253 mechanosensory mechanisms among GPCRs is further supported by our data showing Helix 8 is  
254 not necessary for GPR68 mechanosensitivity. How does mechanical stress differentially activate  
255 GPCRs? Some GPCRs like H1R may use the amphipathic Helix 8 as a gauge to sense outward  
256 lipid displacement upon membrane stretch. In GPR68, in contrast, mechanical forces may  
257 modulate pH-dependent activation, perhaps by acting on the spatial orientation of pH-sensitive  
258 histidine residues, modulating their pKa<sup>20</sup>.

259       It is still unclear whether fluid shear stress is directly sensed by GPR68, *via* a physical  
260 effect of solvent molecules and/or membrane lipids, or indirectly *via* the action of other  
261 mechanosensitive cellular components. Certain G proteins that are physiologically recruited by  
262 GPR68, such as G $\alpha_{q/11}$ , have been reported to exhibit GPCR-independent mechanosensitivity<sup>43</sup>.  
263 However, broad range pharmacological disruption of G protein signaling did not attenuate  
264 mechanical activation of iGlow, suggesting G proteins are not involved in mediating  
265 mechanosensitivity of GPR68. In addition, our data show that neither the spider toxin GsMTx4  
266 nor disruption of actin filaments were effective to attenuate flow-induced iGlow activation, in  
267 contrast to numerous mechanosensitive ion channels which show at least partial reduction of  
268 mechanosensitivity in response to these treatments<sup>33,37,44-50</sup>. Future studies will be needed to  
269 determine whether GPR68 acts as a *bonda fide* mechanotransducer or rely on other  
270 mechanotransducers to sense mechanical forces. To conclude, iGlow represents the first

271 intensiometric indicator for a multimodal mechanosensitive GPCR. We anticipate this reporter  
272 will be compatible with *in vivo* studies to probe the biological roles of GPR68 in vascular and non-  
273 vascular physiology such as hippocampal plasticity.

274 **Methods**

275 **Molecular cloning**

276 A fragment containing the human GPR68 cDNA was obtained by digesting a pBFRT-GPR68  
277 plasmid (a gift from Drs. Mikhail Shapiro, Caltech and Ardèm Patapoutian, Scripps Research) by  
278 NdeI and BamHI. The insert was ligated into an in-house pCDNA3.1-Lck-GCaMP6f plasmid  
279 linearized by the same enzymes, creating the plasmid pCDNA3.1-GPR68. A cpGFP cassette was  
280 amplified by PCR from a pCDNA3.1 plasmid encoding ASAP1 (a gift from Dr. Michael Lin,  
281 Stanford, available as Addgene #52519) and inserted into pCDNA3.1-GPR68 using the NEBuilder  
282 HiFi DNA Assembly kit (New England Biolabs). The pCNDNA3.1-jRGECO1a plasmid was cloned  
283 by assembling PCR-amplified fragments from pGP-CMV-NES-jRGECO1a (Addgene # 61563, a  
284 gift from Dr. Douglas Kim<sup>51</sup>) and pCDNA3.1. All constructs were confirmed by Sanger  
285 sequencing (GENEWIZ). The pLifeAct-mScarlet-N1 plasmid was obtained from Addgene  
286 (#85054, a gift from Dr. Dorus Gadella<sup>52</sup>). All molecular biology reagents were purchased from  
287 New England Biolabs.

288

289 **Cell culture, transfection and drug treatment**

290 HEK293T cells were obtained from the American Tissue Culture Collection and  $\Delta$ PZ1 cells were  
291 a gift from Ardèm Patapoutian (Scripps Research). Cells were cultured in standard conditions (37  
292 °C, 5 % CO<sub>2</sub>) in a Dulbecco's Modified Eagle's Medium supplemented with Penicillin (100 U mL<sup>-1</sup>  
293 <sup>1</sup>), streptomycin (0.1 mg mL<sup>-1</sup>), 10 % sterile Fetal Bovine Serum, 1X Minimum Essential Medium  
294 non-essential amino-acids and without L-glutamine. All cell culture products were purchased from  
295 Sigma-Aldrich. Plasmids were transfected in cells (passage number < 35) seeded in 96-well plates  
296 at ~50 % confluence 2-4 days before the experiment with FuGene6 (Promega) or Lipofectamine

297 2000 (Thermo Fisher Scientific) and following the manufacturer's instructions. 1-2 days before  
298 experiments, cells were gently detached by 5 min incubation with Phosphate Buffer Saline and re-  
299 seeded onto 18 mm round glass coverslips (Warner Instruments) or onto disposable flow chambers  
300 (Ibidi  $\mu$ -slides 0.8 or 0.4mm height), both coated with Matrigel (Corning). CMPD101 (#5642) and  
301 NF-449 (#1391) were purchased from R&D Systems (Biotechne), GTP-gamma-S was purchased  
302 from Cytoskeleton, Inc (#BS01), Dopamine (#H8502) and G $\alpha$ q inhibitor BIM-46187  
303 (#5332990001) were purchased from Sigma-Aldrich.

304

### 305 **Fluorescence imaging**

306 Excitation light of desired wavelengths were produced by a Light Emitting Diode light engine  
307 (Spectra X, Lumencor), cleaned through individual single-band excitation filters (Semrock) and  
308 sent to the illumination port of an inverted fluorescence microscope (IX73, Olympus) by a liquid  
309 guide light. Excitation light was reflected towards a plan super apochromatic 100X oil-immersion  
310 objective with 1.4 numerical aperture 1.4 (Olympus) using a triple-band dichroic mirror  
311 (FF403/497/574, Semrock). Emission light from the sample was filtered through a triple-band  
312 emission filter (FF01-433/517/613, Semrock) and sent through beam-splitting optics (W-View  
313 Gemini, Hamamatsu). Split and unsplit fluorescence images were collected by a sCMOS camera  
314 (Zyla 4.2, ANDOR, Oxford Instruments). Spectral separation by the Gemini was done using flat  
315 imaging dichroic mirrors and appropriate emission filters (Semrock). Images were collected by the  
316 Solis software (ANDOR, Oxford Instruments) at a rate of 1 frame s<sup>-1</sup> through a 10-tap camera link  
317 computer interface. Image acquisition and sample illumination were synchronized using TTL  
318 triggers digitally generated by the Clampex software (Molecular Devices). To reduce light-induced  
319 bleaching, samples were only illuminated during frame acquisition (200 ms exposure). To reduce



320 auto-fluorescence, the cell culture medium was replaced with phenol red-free HBSS  
321 approximately 20 min prior experiments.

322

### 323 **Fluid shear stress stimulation and calculations**

324 Fluid shear-stress stimulation was done by circulating extracellular physiological solutions at  
325 various speeds into a  $\mu$ -slide channel (Ibidi) using a Clampex-controlled peristaltic pump  
326 (Golander). The average amplitude of wall shear stress  $\tau$  applied at the cell surface was estimated  
327 using the manufacturer's empirical equation relating  $\tau$  with flow rate  $\Phi$  for  $\mu$ -slide channel with  
328 0.4 mm height:

$$329 \quad \tau = \eta \times 131.6 \times \Phi$$

330 We independently measured  $\tau$  using particle image velocimetry measurements. Briefly, we  
331 dispensed 6  $\mu\text{m}$  diameter polystyrene beads (Polybead microspheres, Polysciences) diluted in  
332 HBSS into recording  $\mu$ -slide channels and let them settle to the bottom of the  $\mu$ -slide. Beads were  
333 imaged using a 100X immersion objective (Olympus) focused at the fluid-wall boundary. Bead  
334 velocity was estimated using high-speed imaging (300-500 frames  $\text{s}^{-1}$ ) for various flow rates  
335 (Supplementary Table 1).  $\tau$  depends on the distance between the fluid and the boundary  $y$ , the  
336 dynamic viscosity of the fluid  $\mu$  and the flow velocity  $u$  according to:

$$337 \quad \tau_{(y)} = \mu \frac{\partial u}{\partial y}$$

338 Since the beads are located very close to the boundary, we can assume they are within the viscous  
339 sublayer<sup>53</sup>. Hence, in these conditions, the fluid velocity profile is linear with the distance from the  
340 boundary:

$$341 \quad \tau_{(y)} = \mu \frac{u}{y}$$

342 Shear stress values were calculated using the experimentally measured  $u$  values (in  $\text{m s}^{-1}$ ) and  
343 using an averaged bead radius of  $2.5 \times 10^{-6}$  m. For  $\mu$ , we measured the dynamic viscosity of HBSS  
344 at room temperature using a rotary viscometer (USS-DVT4, U.S. SOLID) and obtained a value of  
345  $1.04 \pm 0.04 \times 10^{-3} \text{ Pa s}^{-1}$  ( $n = 3$ ).

346

### 347 **Statistical analyses**

348 The number  $n$  represents the number of independent experiments. To evaluate pairwise differences  
349 of mean data sets, we performed Mann-Whitney U-tests when  $n \leq 10$  and Student's T-tests when  
350  $n > 10$  in both data set. To compare difference of mean values between different treatments, we  
351 performed one-way ANOVA. All error bars are standard errors of the mean. All statistical tests  
352 were performed on OriginPro 2018.

353

354 **Acknowledgments**

355 We thank Ardèm Patapoutian for the gift of the human GPR68 cDNA. This work was supported  
356 by intramural funds from Western University of Health Sciences (to J.J.L), federal work-study (to  
357 L.G) and NIH grants GM130834 and NS101384 (to J.J.L.).

358

359

360

361 **Author contributions**

362 J.J.L. conceived the project. A.D.O., T.G., A.T. and W.P. performed experiments. A.D.O., T.G.  
363 and J.J.L. analyzed data. J.J.L. wrote the manuscript with inputs from A.D.O. and T.G.

364

365

366

## 367 References

- 368 1 Hauser, A. S. *et al.* Pharmacogenomics of GPCR Drug Targets. *Cell* **172**, 41-54 e19,  
369 doi:10.1016/j.cell.2017.11.033 (2018).
- 370 2 Filipek, S., Stenkamp, R. E., Teller, D. C. & Palczewski, K. G protein-coupled receptor rhodopsin: a  
371 prospectus. *Annu. Rev. Physiol.* **65**, 851-879, doi:10.1146/annurev.physiol.65.092101.142611  
372 (2003).
- 373 3 Strasser, A., Wittmann, H. J., Schneider, E. H. & Seifert, R. Modulation of GPCRs by monovalent  
374 cations and anions. *Naunyn Schmiedebergs Arch. Pharmacol.* **388**, 363-380, doi:10.1007/s00210-  
375 014-1073-2 (2015).
- 376 4 Ben-Chaim, Y. *et al.* Movement of 'gating charge' is coupled to ligand binding in a G-protein-  
377 coupled receptor. *Nature* **444**, 106-109, doi:10.1038/nature05259 (2006).
- 378 5 Barchad-Avitzur, O. *et al.* A Novel Voltage Sensor in the Orthosteric Binding Site of the M2  
379 Muscarinic Receptor. *Biophys. J.* **111**, 1396-1408, doi:10.1016/j.bpj.2016.08.035 (2016).
- 380 6 Birk, A., Rinne, A. & Bunemann, M. Membrane Potential Controls the Efficacy of Catecholamine-  
381 induced beta1-Adrenoceptor Activity. *J. Biol. Chem.* **290**, 27311-27320,  
382 doi:10.1074/jbc.M115.665000 (2015).
- 383 7 Rinne, A., Mobarec, J. C., Mahaut-Smith, M., Kolb, P. & Bunemann, M. The mode of agonist  
384 binding to a G protein-coupled receptor switches the effect that voltage changes have on  
385 signaling. *Sci Signal* **8**, ra110, doi:10.1126/scisignal.aac7419 (2015).
- 386 8 Vickery, O. N., Machtens, J. P., Tamburrino, G., Seeliger, D. & Zachariae, U. Structural  
387 Mechanisms of Voltage Sensing in G Protein-Coupled Receptors. *Structure* **24**, 997-1007,  
388 doi:10.1016/j.str.2016.04.007 (2016).
- 389 9 Xu, J. *et al.* GPR68 Senses Flow and Is Essential for Vascular Physiology. *Cell* **173**, 762-775 e716,  
390 doi:10.1016/j.cell.2018.03.076 (2018).
- 391 10 Wei, W. C. *et al.* Coincidence Detection of Membrane Stretch and Extracellular pH by the  
392 Proton-Sensing Receptor OGR1 (GPR68). *Curr. Biol.* **28**, 3815-3823 e3814,  
393 doi:10.1016/j.cub.2018.10.046 (2018).
- 394 11 Chachivili, M., Zhang, Y. L. & Frangos, J. A. G protein-coupled receptors sense fluid shear stress  
395 in endothelial cells. *Proc. Natl. Acad. Sci. U. S. A.* **103**, 15463-15468,  
396 doi:10.1073/pnas.0607224103 (2006).
- 397 12 Storch, U., Mederos y Schnitzler, M. & Gudermann, T. G protein-mediated stretch reception.  
398 *Am. J. Physiol. Heart Circ. Physiol.* **302**, H1241-1249, doi:10.1152/ajpheart.00818.2011 (2012).
- 399 13 Syrovatkina, V., Alegre, K. O., Dey, R. & Huang, X. Y. Regulation, Signaling, and Physiological  
400 Functions of G-Proteins. *J. Mol. Biol.* **428**, 3850-3868, doi:10.1016/j.jmb.2016.08.002 (2016).
- 401 14 Tall, G. G. Ric-8 regulation of heterotrimeric G proteins. *J. Recept. Signal Transduct. Res.* **33**, 139-  
402 143, doi:10.3109/10799893.2013.763828 (2013).
- 403 15 Sjogren, B. Regulator of G protein signaling proteins as drug targets: current state and future  
404 possibilities. *Adv. Pharmacol.* **62**, 315-347, doi:10.1016/B978-0-12-385952-5.00002-6 (2011).
- 405 16 Xu, Y. & Casey, G. Identification of human OGR1, a novel G protein-coupled receptor that maps  
406 to chromosome 14. *Genomics* **35**, 397-402, doi:10.1006/geno.1996.0377 (1996).
- 407 17 Xu, Y. *et al.* Sphingosylphosphorylcholine is a ligand for ovarian cancer G-protein-coupled  
408 receptor 1. *Nat. Cell Biol.* **2**, 261-267, doi:10.1038/35010529 (2000).
- 409 18 Mogi, C. *et al.* Sphingosylphosphorylcholine antagonizes proton-sensing ovarian cancer G-  
410 protein-coupled receptor 1 (OGR1)-mediated inositol phosphate production and cAMP  
411 accumulation. *J. Pharmacol. Sci.* **99**, 160-167, doi:10.1254/jphs.fp0050599 (2005).
- 412 19 Retraction. Sphingosylphosphorylcholine is a ligand for ovarian cancer G-protein-coupled  
413 receptor 1. *Nat. Cell Biol.* **8**, 299, doi:10.1038/ncb1377 (2006).

- 414 20 Ludwig, M. G. *et al.* Proton-sensing G-protein-coupled receptors. *Nature* **425**, 93-98,  
415 doi:10.1038/nature01905 (2003).
- 416 21 Huang, X. P. *et al.* Allosteric ligands for the pharmacologically dark receptors GPR68 and GPR65.  
417 *Nature* **527**, 477-483, doi:10.1038/nature15699 (2015).
- 418 22 Wiley, S. Z., Sriram, K., Salmeron, C. & Insel, P. A. GPR68: An Emerging Drug Target in Cancer. *Int.*  
419 *J. Mol. Sci.* **20**, doi:10.3390/ijms20030559 (2019).
- 420 23 Angers, S. *et al.* Detection of beta 2-adrenergic receptor dimerization in living cells using  
421 bioluminescence resonance energy transfer (BRET). *Proc. Natl. Acad. Sci. U. S. A.* **97**, 3684-3689,  
422 doi:10.1073/pnas.060590697 (2000).
- 423 24 Erdogmus, S. *et al.* Helix 8 is the essential structural motif of mechanosensitive GPCRs. *Nat*  
424 *Commun* **10**, 5784, doi:10.1038/s41467-019-13722-0 (2019).
- 425 25 Patriarchi, T. *et al.* Ultrafast neuronal imaging of dopamine dynamics with designed genetically  
426 encoded sensors. *Science* **360**, doi:10.1126/science.aat4422 (2018).
- 427 26 Sun, F. *et al.* A Genetically Encoded Fluorescent Sensor Enables Rapid and Specific Detection of  
428 Dopamine in Flies, Fish, and Mice. *Cell* **174**, 481-496 e419, doi:10.1016/j.cell.2018.06.042  
429 (2018).
- 430 27 Jing, M. *et al.* A genetically encoded fluorescent acetylcholine indicator for in vitro and in vivo  
431 studies. *Nat. Biotechnol.* **36**, 726-737, doi:10.1038/nbt.4184 (2018).
- 432 28 Feng, J. *et al.* A Genetically Encoded Fluorescent Sensor for Rapid and Specific In Vivo Detection  
433 of Norepinephrine. *Neuron* **102**, 745-761 e748, doi:10.1016/j.neuron.2019.02.037 (2019).
- 434 29 St-Pierre, F. *et al.* High-fidelity optical reporting of neuronal electrical activity with an ultrafast  
435 fluorescent voltage sensor. *Nat. Neurosci.* **17**, 884-889, doi:10.1038/nn.3709 (2014).
- 436 30 Shigetomi, E., Kracun, S. & Khakh, B. S. Monitoring astrocyte calcium microdomains with  
437 improved membrane targeted GCaMP reporters. *Neuron Glia Biol.* **6**, 183-191,  
438 doi:10.1017/S1740925X10000219 (2010).
- 439 31 Hohenegger, M. *et al.* Galpha-selective G protein antagonists. *Proc. Natl. Acad. Sci. U. S. A.* **95**,  
440 346-351, doi:10.1073/pnas.95.1.346 (1998).
- 441 32 Ayoub, M. A. *et al.* Inhibition of heterotrimeric G protein signaling by a small molecule acting on  
442 Galpha subunit. *J. Biol. Chem.* **284**, 29136-29145, doi:10.1074/jbc.M109.042333 (2009).
- 443 33 Bae, C., Sachs, F. & Gottlieb, P. A. The mechanosensitive ion channel Piezo1 is inhibited by the  
444 peptide GsMTx4. *Biochemistry* **50**, 6295-6300, doi:10.1021/bi200770q (2011).
- 445 34 Li, H. *et al.* The neuropeptide GsMTx4 inhibits a mechanosensitive BK channel through the  
446 voltage-dependent modification specific to mechano-gating. *J. Biol. Chem.* **294**, 11892-11909,  
447 doi:10.1074/jbc.RA118.005511 (2019).
- 448 35 Jetta, D., Gottlieb, P. A., Verma, D., Sachs, F. & Hua, S. Z. Shear stress-induced nuclear shrinkage  
449 through activation of Piezo1 channels in epithelial cells. *J. Cell Sci.* **132**, doi:10.1242/jcs.226076  
450 (2019).
- 451 36 Suchyna, T. M. *et al.* Bilayer-dependent inhibition of mechanosensitive channels by neuroactive  
452 peptide enantiomers. *Nature* **430**, 235-240, doi:10.1038/nature02743 (2004).
- 453 37 Alcaïno, C., Knutson, K., Gottlieb, P. A., Farrugia, G. & Beyder, A. Mechanosensitive ion channel  
454 Piezo2 is inhibited by D-GsMTx4. *Channels (Austin)* **11**, 245-253,  
455 doi:10.1080/19336950.2017.1279370 (2017).
- 456 38 Zhang, Y. L., Frangos, J. A. & Chachisvilis, M. Mechanical stimulus alters conformation of type 1  
457 parathyroid hormone receptor in bone cells. *Am. J. Physiol. Cell Physiol.* **296**, C1391-1399,  
458 doi:10.1152/ajpcell.00549.2008 (2009).
- 459 39 Kwon, H. B. *et al.* In vivo modulation of endothelial polarization by Apelin receptor signalling.  
460 *Nat Commun* **7**, 11805, doi:10.1038/ncomms11805 (2016).

- 461 40 Mederos y Schnitzler, M. *et al.* Gq-coupled receptors as mechanosensors mediating myogenic  
462 vasoconstriction. *EMBO J.* **27**, 3092-3103, doi:10.1038/emboj.2008.233 (2008).
- 463 41 Jung, B. *et al.* Flow-regulated endothelial S1P receptor-1 signaling sustains vascular  
464 development. *Dev. Cell* **23**, 600-610, doi:10.1016/j.devcel.2012.07.015 (2012).
- 465 42 Abdul-Majeed, S. & Nauli, S. M. Dopamine receptor type 5 in the primary cilia has dual chemo-  
466 and mechano-sensory roles. *Hypertension* **58**, 325-331,  
467 doi:10.1161/HYPERTENSIONAHA.111.172080 (2011).
- 468 43 Dela Paz, N. G., Melchior, B. & Frangos, J. A. Shear stress induces Galphaq/11 activation  
469 independently of G protein-coupled receptor activation in endothelial cells. *Am. J. Physiol. Cell*  
470 *Physiol.* **312**, C428-C437, doi:10.1152/ajpcell.00148.2016 (2017).
- 471 44 Kamaraju, K., Gottlieb, P. A., Sachs, F. & Sukharev, S. Effects of GsMTx4 on bacterial  
472 mechanosensitive channels in inside-out patches from giant spheroplasts. *Biophys. J.* **99**, 2870-  
473 2878, doi:10.1016/j.bpj.2010.09.022 (2010).
- 474 45 Hurst, A. C., Gottlieb, P. A. & Martinac, B. Concentration dependent effect of GsMTx4 on  
475 mechanosensitive channels of small conductance in E. coli spheroplasts. *Eur. Biophys. J.* **38**, 415-  
476 425, doi:10.1007/s00249-008-0386-9 (2009).
- 477 46 Nishizawa, M. & Nishizawa, K. Molecular dynamics simulations of a stretch-activated channel  
478 inhibitor GsMTx4 with lipid membranes: two binding modes and effects of lipid structure.  
479 *Biophys. J.* **92**, 4233-4243, doi:10.1529/biophysj.106.101071 (2007).
- 480 47 Ostrow, K. L. *et al.* cDNA sequence and in vitro folding of GsMTx4, a specific peptide inhibitor of  
481 mechanosensitive channels. *Toxicon* **42**, 263-274 (2003).
- 482 48 Jia, Z., Ikeda, R., Ling, J., Viatchenko-Karpinski, V. & Gu, J. G. Regulation of Piezo2  
483 Mechanotransduction by Static Plasma Membrane Tension in Primary Afferent Neurons. *J. Biol.*  
484 *Chem.* **291**, 9087-9104, doi:10.1074/jbc.M115.692384 (2016).
- 485 49 Shen, B. *et al.* Plasma membrane mechanical stress activates TRPC5 channels. *PLoS One* **10**,  
486 e0122227, doi:10.1371/journal.pone.0122227 (2015).
- 487 50 Gottlieb, P. A., Bae, C. & Sachs, F. Gating the mechanical channel Piezo1: a comparison between  
488 whole-cell and patch recording. *Channels (Austin)* **6**, 282-289, doi:10.4161/chan.21064 (2012).
- 489 51 Dana, H. *et al.* Sensitive red protein calcium indicators for imaging neural activity. *Elife* **5**,  
490 doi:10.7554/eLife.12727 (2016).
- 491 52 Bindels, D. S. *et al.* mScarlet: a bright monomeric red fluorescent protein for cellular imaging.  
492 *Nat. Methods* **14**, 53-56, doi:10.1038/nmeth.4074 (2017).
- 493 53 Ranade, S. S. *et al.* Piezo1, a mechanically activated ion channel, is required for vascular  
494 development in mice. *Proc. Natl. Acad. Sci. U. S. A.* **111**, 10347-10352,  
495 doi:10.1073/pnas.1409233111 (2014).

496

497

498 **Figures Legends**

499 **Figure 1: Design and characterization of iGlow.** (A) *Top*: iGlow was designed by inserting a  
500 cpGFP cassette (green) into the third intracellular loop (IL3) of GPR68 (purple). *Bottom*: structural  
501 model of iGlow generated using the Molecular Operating Environment (MOE) software from the  
502 crystal structure of cpGFP (PDBID: 3O77, green) and a structural model of GPR68 (purple)  
503 generated by Huang et al.<sup>21</sup>. (B) Epifluorescence images showing iGlow fluorescence in static or  
504 flow condition (bar = 10  $\mu\text{m}$ ). (C) Fluorescence time-course (plotted as  $\Delta F/F_0$  vs. time) from a cell  
505 co-expressing iGlow (purple trace) and mCherry (black trace) in response to intermittent shear  
506 stress pulses (10 sec on, 10 sec off) of incrementally-increased amplitudes. (D) Scatter plot  
507 showing the maximal  $\Delta F/F_0$  values produced by iGlow using our intermittent flow protocol. (E)  
508 Distribution of fluorescence threshold for cells stimulated using the intermittent flow protocol. (F)  
509 Time-course of iGlow fluorescence upon a 2.6  $\text{dyne cm}^{-2}$  FSS pulse. (G) Time-course of dLight1.2  
510 fluorescence upon acute perfusion with 10  $\mu\text{M}$  dopamine. (H) Scatter plots comparing max  $\Delta F/F_0$   
511 values obtained between iGlow and dLight1.2 with protocols depicted in (F) and (G). (I). The  
512 Number above the scatter plots in panel (H) indicates exact p-value from a Student's T-test. Error  
513 bars = s.e.m.

514

515 **Figure 2: iGlow senses known mechanical and chemical stimuli of GPR68.** (A) Time-course  
516 of iGlow fluorescence in response to acute incubation with 10  $\mu\text{M}$  ogerin (black trace) or a vehicle  
517 control (HBSS, gray trace). (B) Scatter plots showing max  $\Delta F/F_0$  values obtained upon incubation  
518 with ogerin (black dots, n = 6) or a vehicle control (gray dots, n = 7). (C) Time-course of iGlow  
519 fluorescence in response to a 2.6  $\text{dyne cm}^{-2}$  FSS pulse at indicated extracellular pH values. (D)  
520 Scatter plots showing max  $\Delta F/F_0$  values obtained by acute application of FSS at pH 6.5 (blue dots,

521 n = 10), pH 7.3 (black dots, n = 24) or pH 8.2 (red dots, n = 28). Numbers above plots indicate  
522 exact p-values from a Mann Whitney U-test (B), one-way ANOVA (E) or Student's T-tests (E).  
523 Error bars = s.e.m.

524

525 **Figure 3: iGlow detects G-protein recruitment upon GPR68 activation.** (A) Expected effects  
526 of pharmacological treatments on protein-protein interactions between iGlow, G $\alpha$ s/q/11 proteins  
527 and GRK2/3. (B) Time-course of iGlow fluorescence upon treatments with 0.2 mM GTP- $\gamma$ -S (red  
528 trace), 20  $\mu$ M NF-449 (blue trace), 20  $\mu$ M BIM-46187 (green trace), 10  $\mu$ M CMPD101 (purple  
529 trace) or a vehicle control (black trace) and subjected to an acute FSS pulse. (C) Scatter plots  
530 showing the max  $\Delta F/F_0$  values obtained following shear stress stimulation in cells treated with  
531 GTP- $\gamma$ -S (red dots, n = 33), NF-449 (blue dots, n = 20), BIM-46187 (green dots, n = 21),  
532 CMPD101 (purple dots, n = 17) or a vehicle control (black dots, n = 25). Numbers above plots in  
533 panel (C) indicate exact p-values from Student's T-tests between control and treated samples. Error  
534 bars = s.e.m.

535

536 **Figure 4: iGlow's mechanosensitivity is resilient.** (A) Cytochalasin D (CD)-mediated disruption  
537 of actin cytoskeleton (bar = 10  $\mu$ m). (B) Time-course of flow-induced iGlow fluorescence  
538 following 20 min incubation with 20  $\mu$ M CD (red trace), 50  $\mu$ M CD (blue trace) or untreated  
539 control (black trace). (C) Scatter plots showing max  $\Delta F/F_0$  values after treatment with 20  $\mu$ M CD  
540 (red dots, n = 25), 50  $\mu$ M CD (blue dots, n = 16) or in untreated cells (black dots, n = 24). (D)  
541 Time-course of flow-induced Ca<sup>2+</sup> entry in cells expressing PIEZO1 and GCaMP6f in presence  
542 (blue trace) or absence (black trace) of 2.5  $\mu$ M GsMTx4. (E) Scatter plots showing max  $\Delta F/F_0$   
543 values obtained from (D) in absence (black dots, n = 31) or presence (blue dots, n = 39) of 2.5  $\mu$ M



544 GsMTx4. **(F)** Time-course of flow-induced iGlow fluorescence in presence (blue trace) or absence  
545 (black trace) of 2.5  $\mu$ M GsMTx4. **(G)** Scatter plots showing max  $\Delta F/F_0$  values obtained from **(F)**  
546 in absence (black dots, n = 18) or presence (blue dots, n = 15) of 2.5  $\mu$ M GsMTx4. **(H)** C-terminal  
547 sequences of iGlow and the deletion mutant (H8del). **(I)** Time-course of flow-induced fluorescence  
548 from iGlow and the H8del mutant. **(J)** Scatter plots showing max  $\Delta F/F_0$  values from iGlow (black  
549 dots, n = 24) and H8del (grey dots, n = 6) from **(I)**. Numbers above plots indicate exact p-values  
550 from one-way ANOVA **(C)**, Student's T-tests **(E)** and **(G)** or a Mann-Whitney U-test **(J)**. Error  
551 bars = s.e.m.

552

553

554

555

556

557 **Figures**

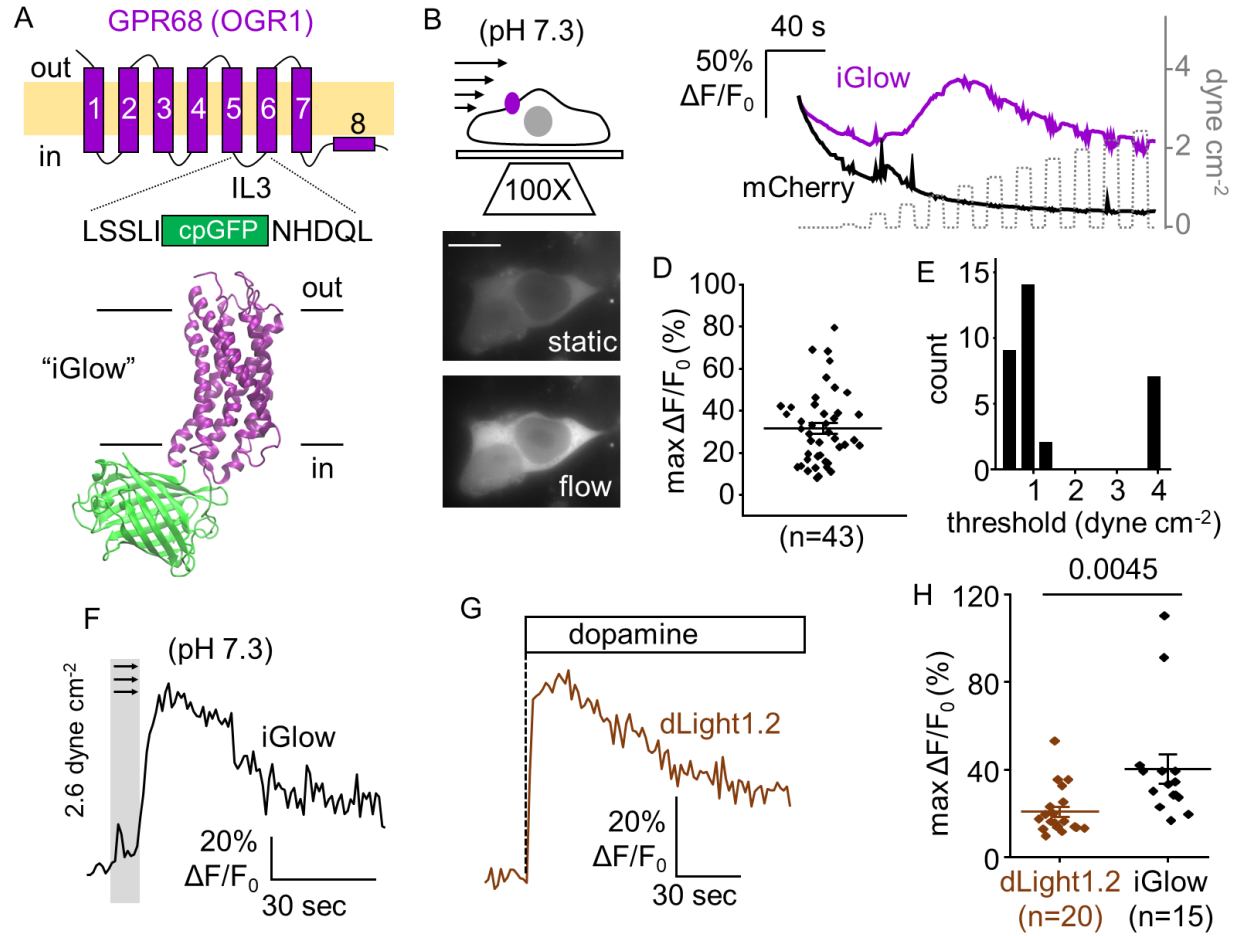

558

559

560

561

562

563

Figure 1

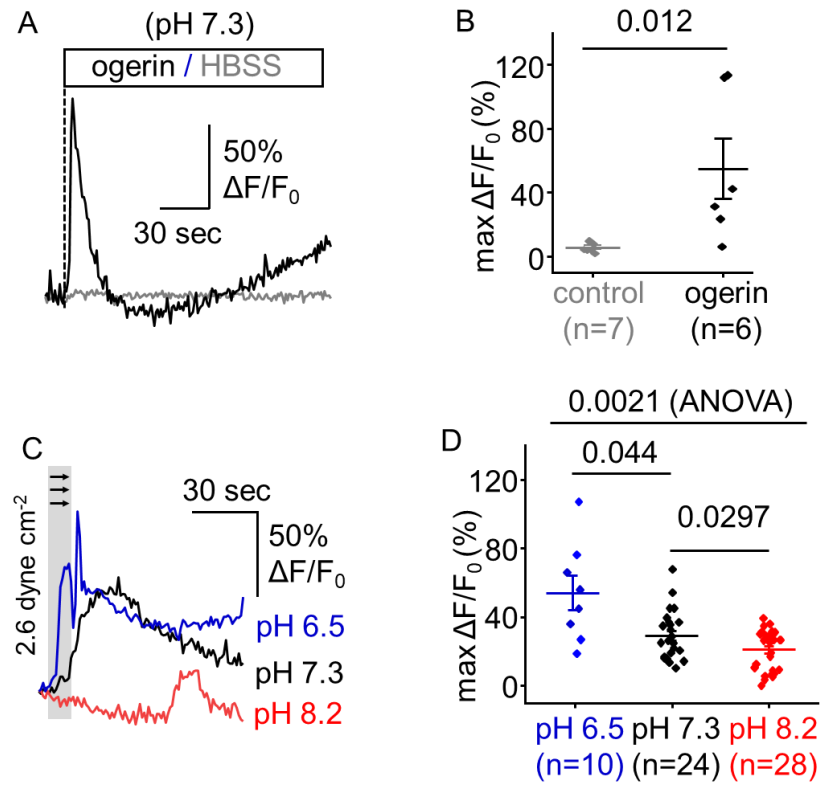

564

565

566

567

568

569

Figure 2

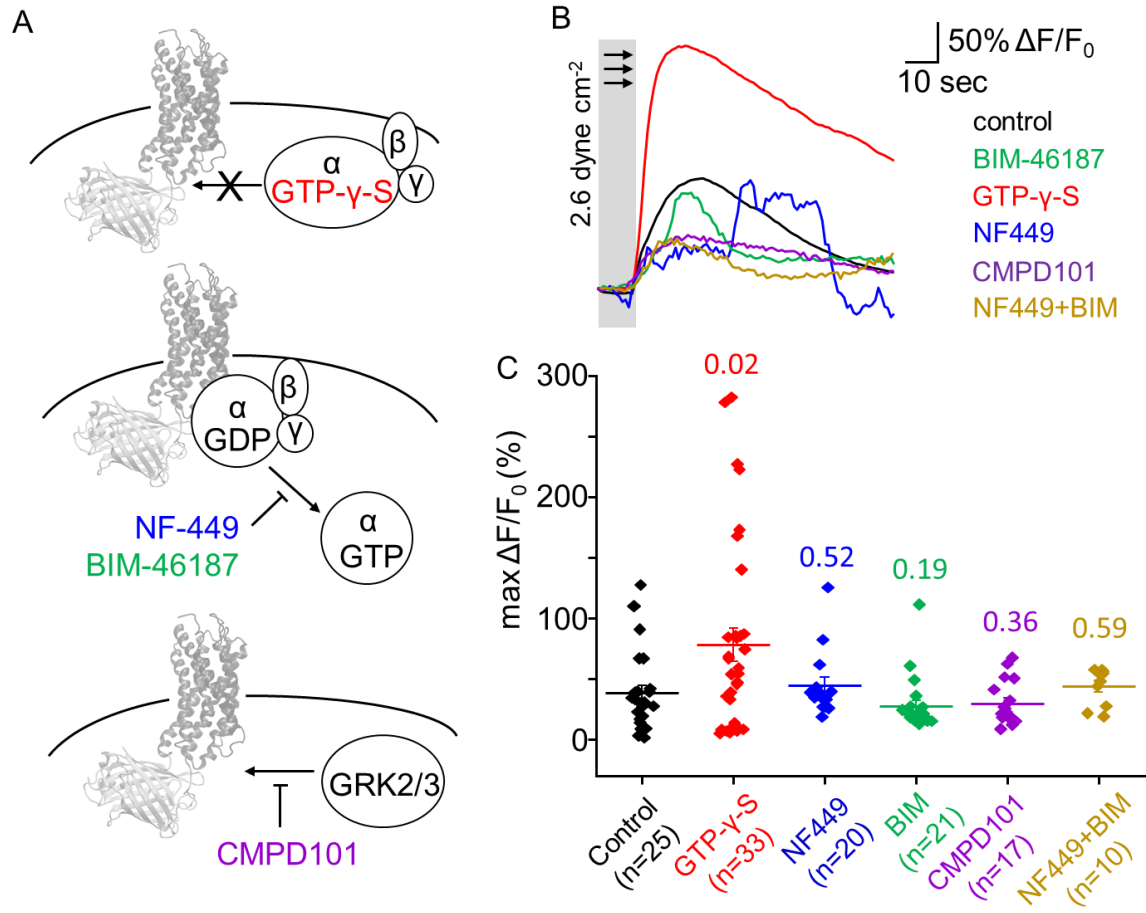

570

571

572

573

574

575

Figure 3

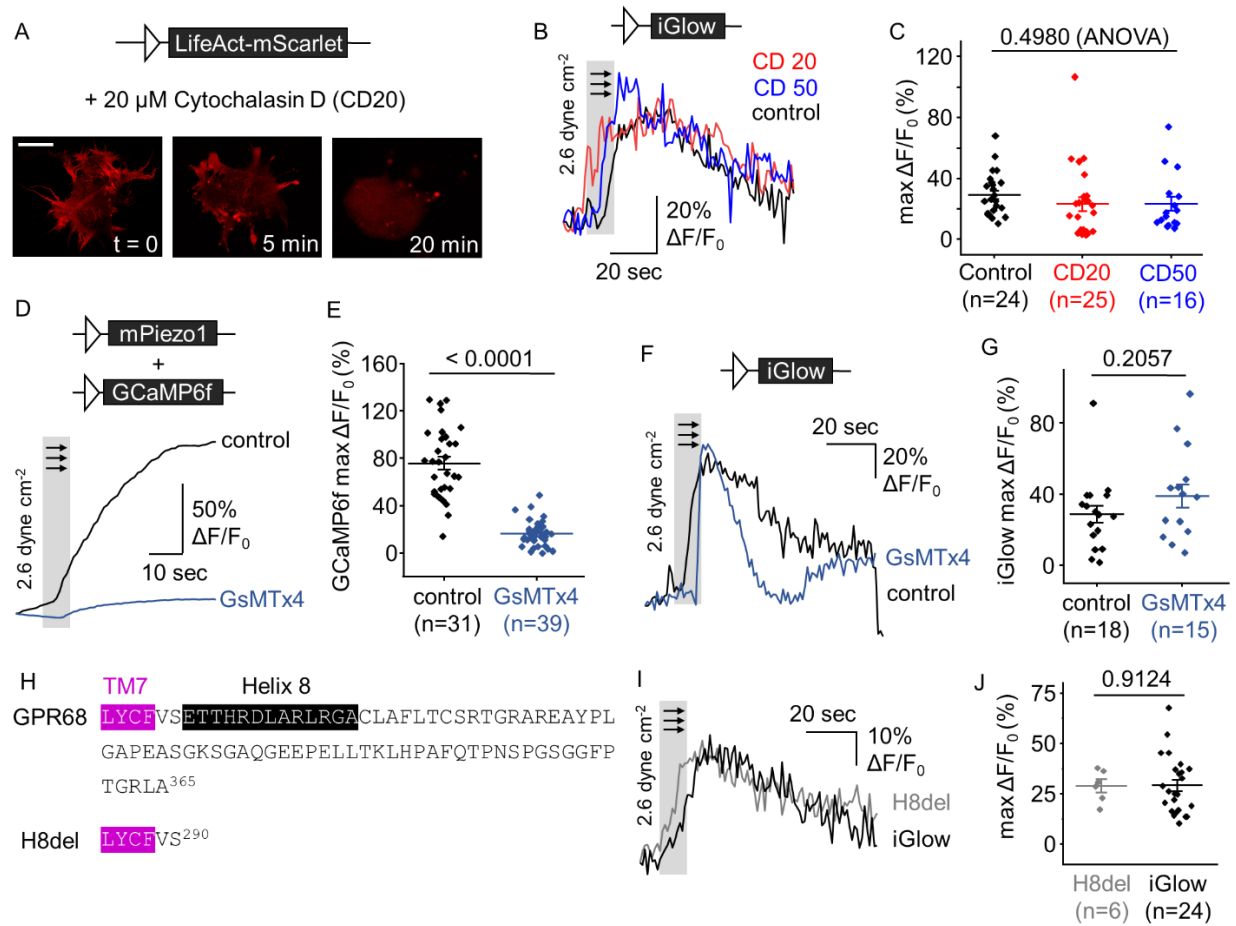

576

577

578

579

580

Figure 4

581 **Supplementary Materials**

582 ATGGGGAACATCACTGCAGACAACCTCCTCGATGAGCTGTACCATCGACCATAACCATCCACCAGACGCTGG  
583 CCCCAGTGGTCTATGTTACCGTGTGGTGGTGGCTTCCCAGCAACTGCCTGTCCCTCTACTTCGGCTA  
584 CCTGCAGATCAAGGCCCGGAACGAGCTGGGCGTGTACCTGTGCAACCTGACGGTGGCCGACCTCTTCTAC  
585 ATCTGCTCGCTGCCCTTCTGGCTGCAGTACGTGCTGCAGCACGACAACCTGGTCTCACGGCGACCTGTCTT  
586 GCCAGGTGTGCGGCATCCTCCTGTACGAGAACATCTACATCAGCGTGGGCTTCCCTCTGCTGCATCTCCGT  
587 GGACCGCTACCTGGCTGTGGCCATCCCTTCCGCTTCCACCAGTCCGGACCCTGAAGGCGGCCGCTCGGC  
588 GTCAGCGTGGTCATCTGGGCCAAGGAGCTGCTGACCAGCATCTACTTCCCTGATGCACGAGGAGGTTCATCG  
589 AGGACGAGAACCAGCACCGCGTGTGCTTTGAGCACTACCCCATCCAGGCATGGCAGCGCGCCATCAACTA  
590 CTACCGCTTCCCTGGTGGGCTTCCCTTCCCCATCTGCCTGCTGCTGGCGTCCCTACCAGGCATCCTGCGC  
591 GCCGTGCGCCGGAGC**CTGAGCTCACTCATTAA**CGTCTATATCAAGGCCGACAAGCAGAAGAACGGCATCA  
592 **AGGCGAACTTCAAGATCCGCCACAACATCGAGGACGGCGGCGTGCAGCTCGCTACCCTACCAGCAGAA**  
593 **CACCCCATCGGCGACGGCCCCGTGCTGCTGCCGACAACCCTACCTGAGCGTGCAGTCCAAACTTTTCG**  
594 **AAAGACCCCAACGAGAAGCGGATCACATGGTCCCTGCTGGAGTTCGTGACCGCCGCCGGGATCACTCTCG**  
595 **GCATGGACGAGCTGTACAAGGGCGGTACCGGAGGGAGCATGGTGAGCAAGGGCGAGGAGCTGTTACCGG**  
596 **GGTGGTGGCCATCCTGGTCGAGCTGGACGGCGACGTAACGGCCACAAGTTCAGCGTGTCCGGCGAGGGT**  
597 **GAGGGCGATGCCACCTACGGCAAGCTGACCCTGAAGTTCATCTGCACCACCGGCAAGCTGCCCGTGCCCT**  
598 **GGCCACCCTCGTGACCACCCTGACCTACGGCGTGCAGTGCTTACGCCGCTACCCGACCACATGAAGCA**  
599 **GCACGACTTCTTCAAGTCCGCCATGCCGAAGGCTACATCCAGGAGCGCACCATCTTCTTCAAGGACGAC**  
600 **GGCAACTACAAGACCCGCGCCGAGGTGAAGTTCGAGGGCGACACCCGGTGAACCGCATCGAGCTGAAGG**  
601 **GCATCGACTTCAAGGAGGACGGCAACATCCTGGGGCACAAGCTGGAGTACAAC**AATCATGACCAACTG**AG**  
602 **CCGCAAGGACCAGATCCAGCGGCTGGTGTCTAGCACCGTGGTCATCTTCCCTGGCTGCTTCCCTGCCCTAC**  
603 **CACGTGTTGCTGCTGGTGCAGCGTCTGGGAGGCCAGCTGCGACTTCGCCAAGGGCGTTTTTCAACGCCT**  
604 **ACCCTTCTCCCTCCTGCTCACCAGCTTCAACTGCGTGCCTGACCCCGTCTACTGCTTCCGTCAGCGA**  
605 **GACCACCCACCGGACCTGGCCCGCTCCGCGGGGCTGCCTGGCTTCCCTCACCTGCTCCAGGACCGGC**  
606 **CGGGCCAGGGAGGCTACCCGCTGGGTGCCCCCGAGGCCTCCGGGAAAAGCGGGGCCAGGGTGAGGAGC**  
607 **CCGAGCTGTTGACCAAGCTCCACCCGGCCTTCCAGACCCCTAACTCGCCAGGGTCGGGCGGGTCCCCAC**  
608 **GGGCAGG**  
609  
610 MGNI TADNSSMSCTIDHTIHQTLAPVVVYTVLVVGF PANCLSLYFGYLQIKARNELGVYLCNLTVADLFY  
611 ICSLPFWLQYVLQHDNWSHGDLSCQVCGILLYENIYISVGF LCCISVD RYLAVAH PFRFHQFRTLKA AVG  
612 VSVVIWAKELLTSIYFLMHEEVIEDENQHRVCFEHPYIQAWQRAINYYRFLVGF LFPICLLLLASYQGILR  
613 AVRR**LSSLIN**VYIKADKQKNGIKANFKIRHNI EDGGVQLAYHYQQNTPIGDGPVLLPDNH YLSVQSKLS  
614 KDPNEKRDMVLLLEFVTAAGITLGMDELYKGGTGGSMVSKGEELFTGVVPI LVELDGDVNGHKFSVSGEG  
615 EGDATYGLTLKFICTTGKLPVPWPTLVTTLT YGVQCFSRYPDHMKQHDFFKSAMPEGYIQERTIFFKDD  
616 GNYKTRAEVKFEGDTLVNRIELKGI DFKEDGNILGHKLEYN**NHDQL**SRKDQIQRLV LSTVVI FLACFLPY  
617 HVLLLVR SVWEASCDFAKGVFNAYHFSLL LTSFN CVADPVLYCFVSETTHRDLARLRGACLAFLTCSRTG  
618 RAREAYPLGAPEASGKSGAQGEEPELLTKLHPAFQTPNSPGSGGFPTGR  
619

620 **Supplementary Figure 1: Nucleic acid (top) and amino acids (bottom) sequences of iGlow.**

621 Black: GPR68; bold purple: linkers and green: cpGFP.

622

| <b>primers</b>         | <b>Sequences (5'→3')</b>                      |
|------------------------|-----------------------------------------------|
| GPR68 Fwd (backbone)   | aatcatgaccaactgagccgcaaggaccagatccagcgg       |
| GPR68 Rev (backbone)   | aatgagtgagctcaggctccggcgcacggcgcg             |
| cpGFP with linkers Fwd | gcgccggagcctgagctcactcattaacgtctatatcaaggcc   |
| cpGFP with linkers Rev | ccttgccggctcagttggtcatgattggtgtactccagcttggtg |

623

624 **Supplementary Table 1: primers used to insert cpGFP into GPR68 using DNA assembly.**

625

626

627

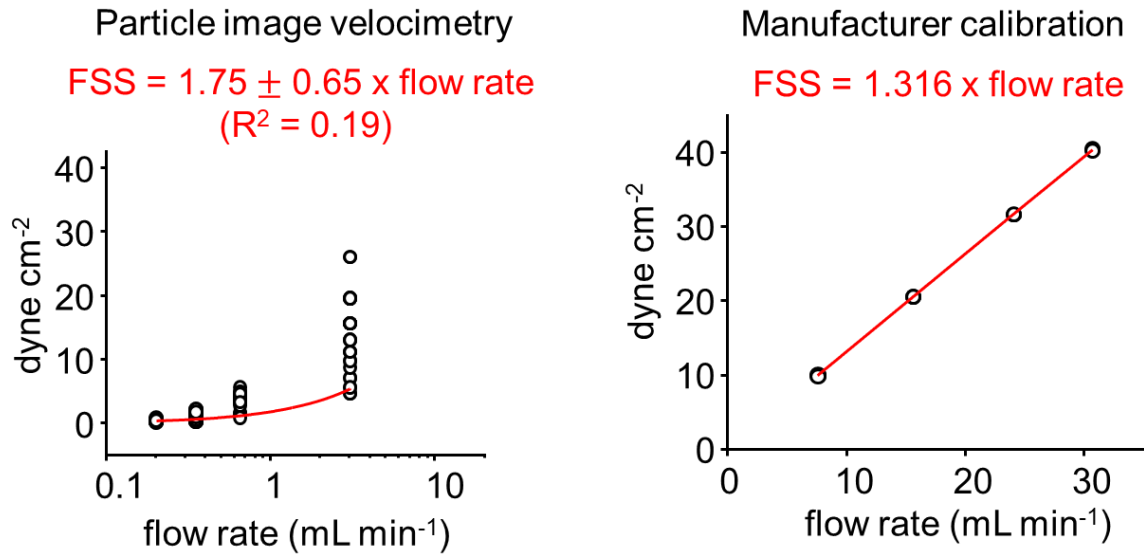

628

629

630 **Supplementary Figure 2: Shear stress calibration.** Shear stress applied through our flow  
631 chamber was calculated using particle image velocimetry (see methods) or using the  
632 manufacturer's calibration.

633



634

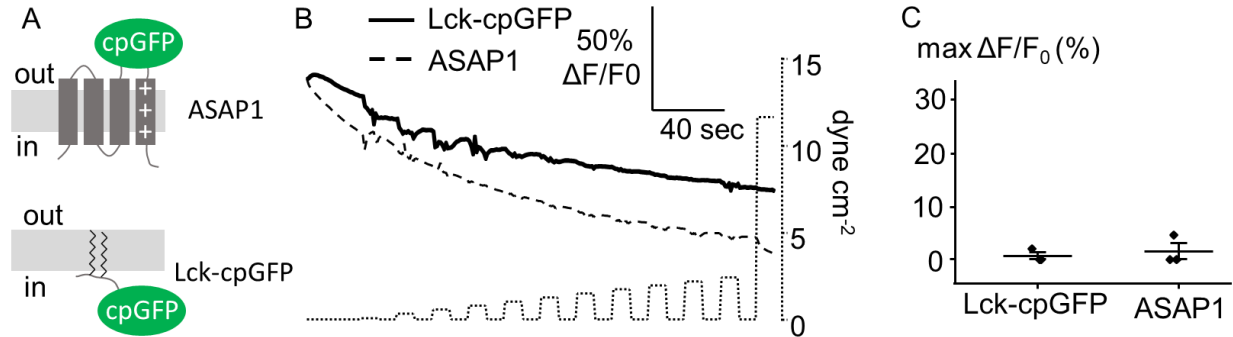

635

636

637 **Supplementary Figure 3: membrane-bound cpGFP does not directly sense shear stress.** (A)

638 Cartoons illustrating the position of cpGFP in the voltage indicator ASAP1 and Lck-cpGFP. (B)

639 Example of fluorescence time-course (shown as  $\Delta F/F_0$  vs. time) from a single cell expressing

640 ASAP1 (dashed line) or Lck-cpGFP (solid line) in response to FSS pulses of incrementally

641 increased amplitudes (dotted line). (C) Scatter plot showing the maximal  $\Delta F/F_0$  values obtained

642 with ASAP1 (n = 3) and Lck-cpGFP (n = 3) using the FSS protocol shown in (B).

643

644

645

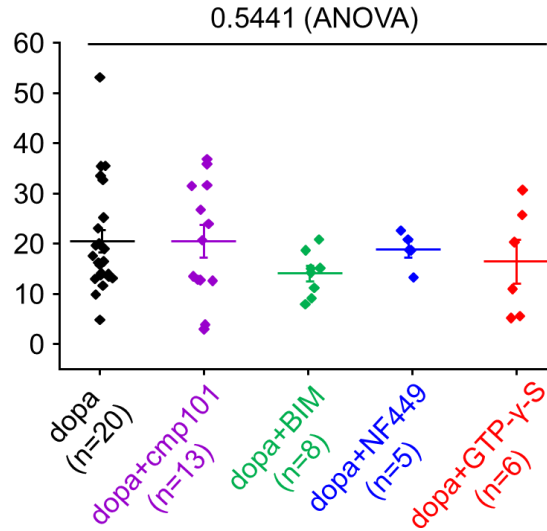

646

647

648 **Supplementary Figure 4: dLight1.2 is insensitive to pharmacological treatments.** The scatter  
649 plots show max  $\Delta F/F_0$  values obtained upon acute perfusion with 10  $\mu$ M dopamine and CMPD101  
650 (purple dots, n = 13), BIM-46187 (BIM, green dots, n = 8), NF-449 (blue dots, n = 5), GTP- $\gamma$ -S  
651 (red dots, n = 6), or a vehicle control (black dots, n = 20). The number above the graph indicates  
652 the exact p-value from a one-way ANOVA. Error bars = s.e.m.

653

654

655

656

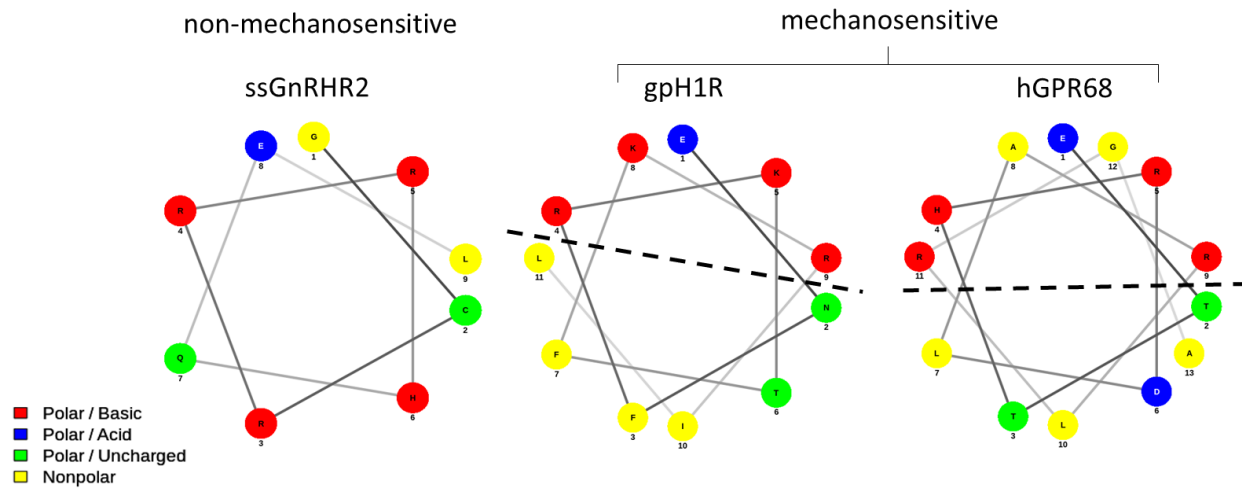

657

658 **Supplementary Figure 5. Prediction of an amphipathic Helix 8 in GPR68 using the online**  
659 **predictor NetWheels.** Helical wheel plot of Helix 8 in the long isoform of the swine gonadotropin-  
660 releasing hormone receptor (ssGnRHR2), the guinea pig histamine H1 receptor (gpH1R) and  
661 human GPR68 (hGPR68). The dotted line indicates the separation between the polar vs. apolar  
662 interfaces of the Helix.

663

664

665

666

667

668

669
